# Supplementary material for: Mucosal vaccination with a live recombinant rhinovirus followed by intradermal DNA administration elicits potent and protective HIV-specific immune responses
Source: PubMed Central journal article supplement (PMC5113119; doi:10.1038/srep36658), 2016-11-17
Supplement: srep36658-s1.pdf [file srep36658-s1.pdf]

1 **Mucosal vaccination with a live recombinant rhinovirus followed by intradermal DNA**  
2 **administration elicits potent and protective HIV-specific immune responses**

3  
4 Khamis Tomusange<sup>1</sup>, Danushka Wijesundara<sup>1</sup>, Jason Gummow<sup>1</sup>, Steve Wesselingh<sup>2</sup>, Andreas  
5 Suhrbier<sup>3</sup>, Eric J. Gowans<sup>1</sup> and Branka Grubor-Bauk<sup>1#</sup>

6 <sup>1</sup>Virology Laboratory, Basil Hetzel Institute, Discipline of Surgery, University of Adelaide,  
7 Adelaide, South Australia, Australia.

8 <sup>2</sup>South Australian Health and Medical Research Institute, Adelaide, South Australia,  
9 Australia

10 <sup>3</sup>QIMR Berghofer Medical Research Institute, Brisbane, Queensland, Australia

11

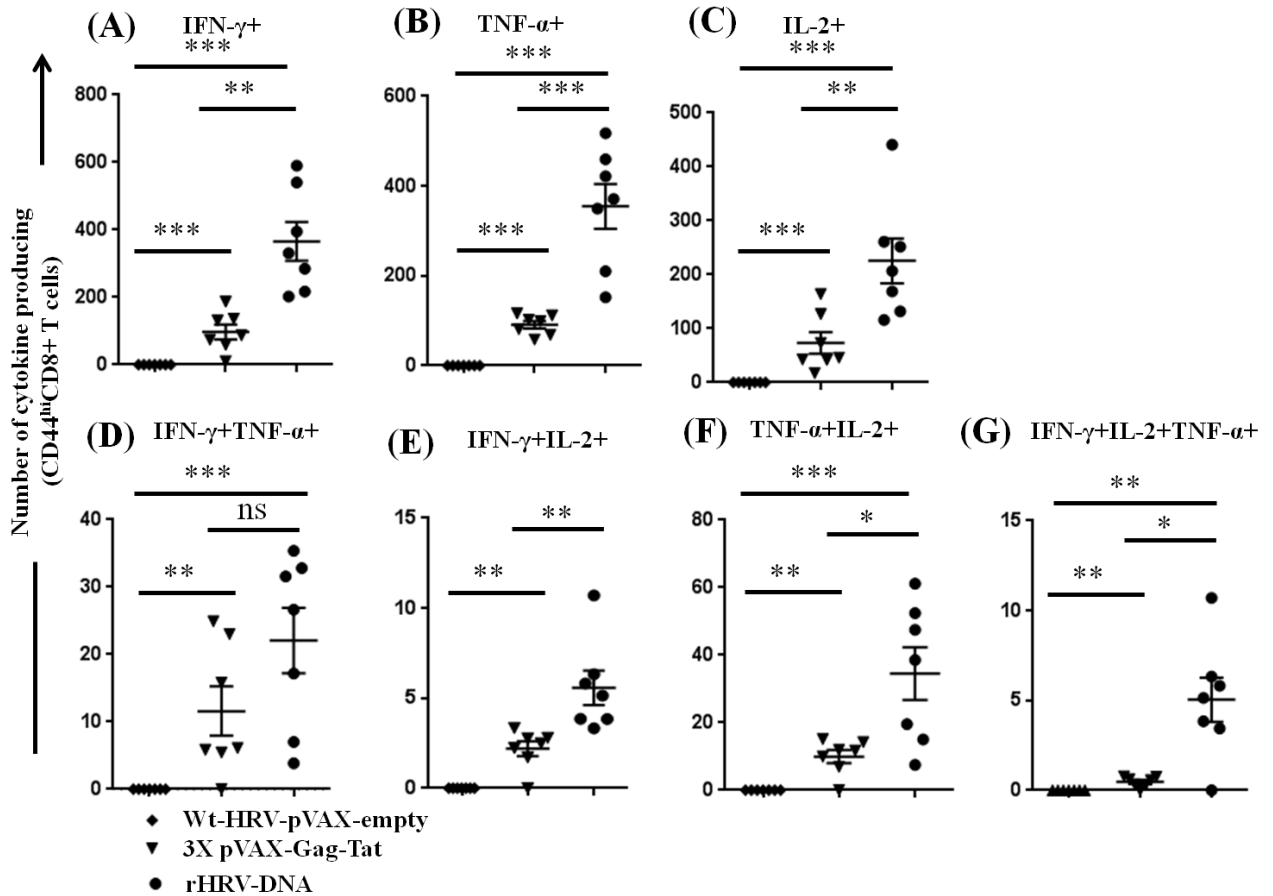

12

13 **Supplementary Fig S1. rHRV-DNA vaccination elicits superior Gag-specific effector**

14 **memory CMI in the spleen.** Mice were vaccinated as described in the legend to figure 1 and

15 splenocytes harvested 14 days after the last dose. Splenocytes were stimulated for 1 h with 5

16  $\mu\text{g/ml}$  of the H-2K<sup>d</sup>-restricted Gag<sub>197-205</sub> immuno-dominant in the presence of protein transport

17 inhibitor (Brefeldin A, eBiosciences) for a further 6h. Cytokine production was analyzed by flow

18 cytometry. We gated on memory CD8<sup>+</sup> T cells to assess the number of CD44<sup>hi</sup>CD8<sup>+</sup> T cells

19 producing (A) IFN- $\gamma$ , (B) TNF- $\alpha$ , (C) IL-2, (D) IFN- $\gamma$  and TNF- $\alpha$ , (E) IFN- $\gamma$  and IL-2, (F)

20 TNF- $\alpha$  and IL-2 and (G) IFN- $\gamma$ , TNF- $\alpha$  and IL-2 after stimulation. The data are representative

21 of 2 independent experiments, plotted as mean (n = 7)  $\pm$  SEM and each symbol represents an

22 individual mouse. \* p  $\leq$  0.05, \*\* p  $\leq$  0.01, \*\*\* p  $\leq$  0.001 and <sup>ns</sup> p > 0.05 (Mann-Whitney U

23 test).

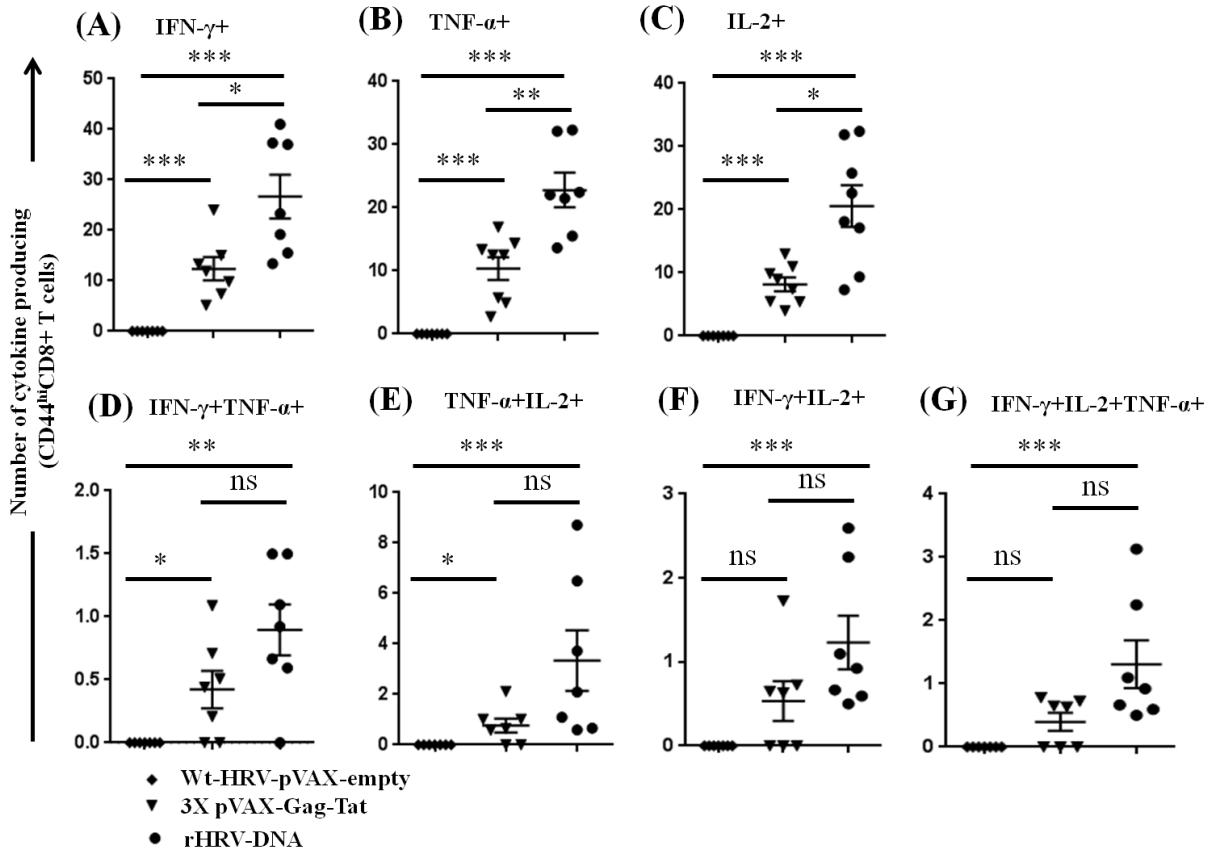

24

25 **Supplementary Fig S2. rHRV-DNA vaccination elicits a robust Gag-specific effector**

26 **memory CMI at the gut mucosa.** Mice were vaccinated as described in the legend to figure

27 1 and lymphocytes from mesenteric lymph nodes harvested 14 days after the final dose. The

28 lymphocytes were stimulated for 1 h with 5  $\mu$ g/ml of the H-2K<sup>d</sup>-restricted Gag<sub>197-205</sub> immuno-

29 dominant peptide in the presence of Brefeldin A for a further 6 h. Cytokine production was

30 analyzed by flow cytometry. We gated on memory CD8<sup>+</sup> T cells to assess the number of

31 CD44<sup>hi</sup>CD8<sup>+</sup> T cells producing (A) IFN- $\gamma$ , (B) TNF- $\alpha$ , (C) IL-2, (D) IFN- $\gamma$  and TNF- $\alpha$ ,

32 (E) TNF- $\alpha$  and IL-2, (F) IFN- $\gamma$  and IL-2 and (G) IFN- $\gamma$ , TNF- $\alpha$  and IL-2 after stimulation. The

33 data are representative of 2 independent experiments and are plotted as mean (n = 7)  $\pm$  SEM

34 and each symbol represents an individual mouse. \* p  $\leq$  0.05 and \*\* p  $\leq$  0.01 (Mann-Whitney

35 U test).

36

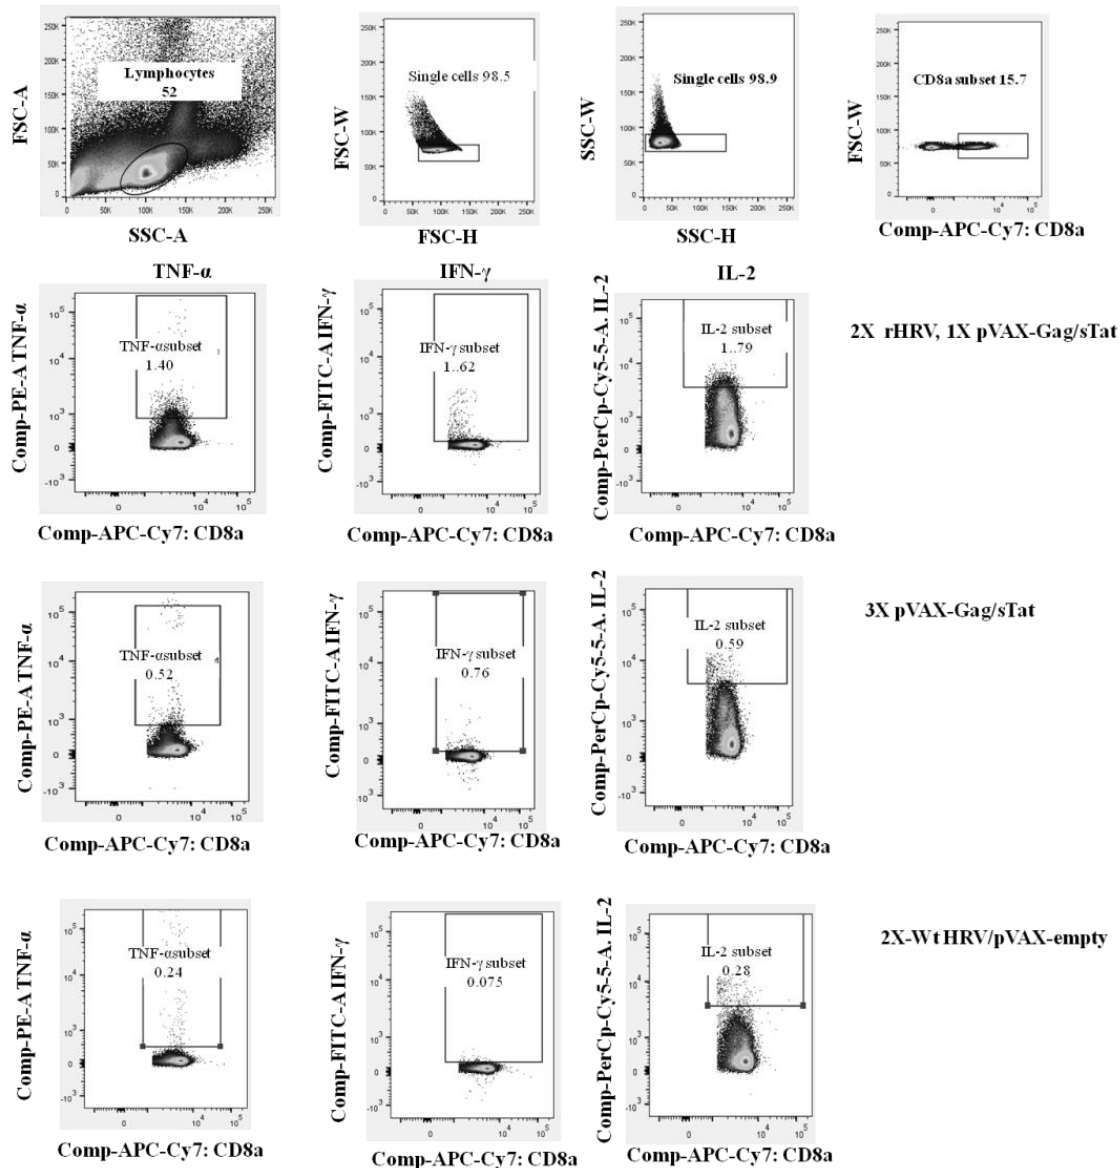

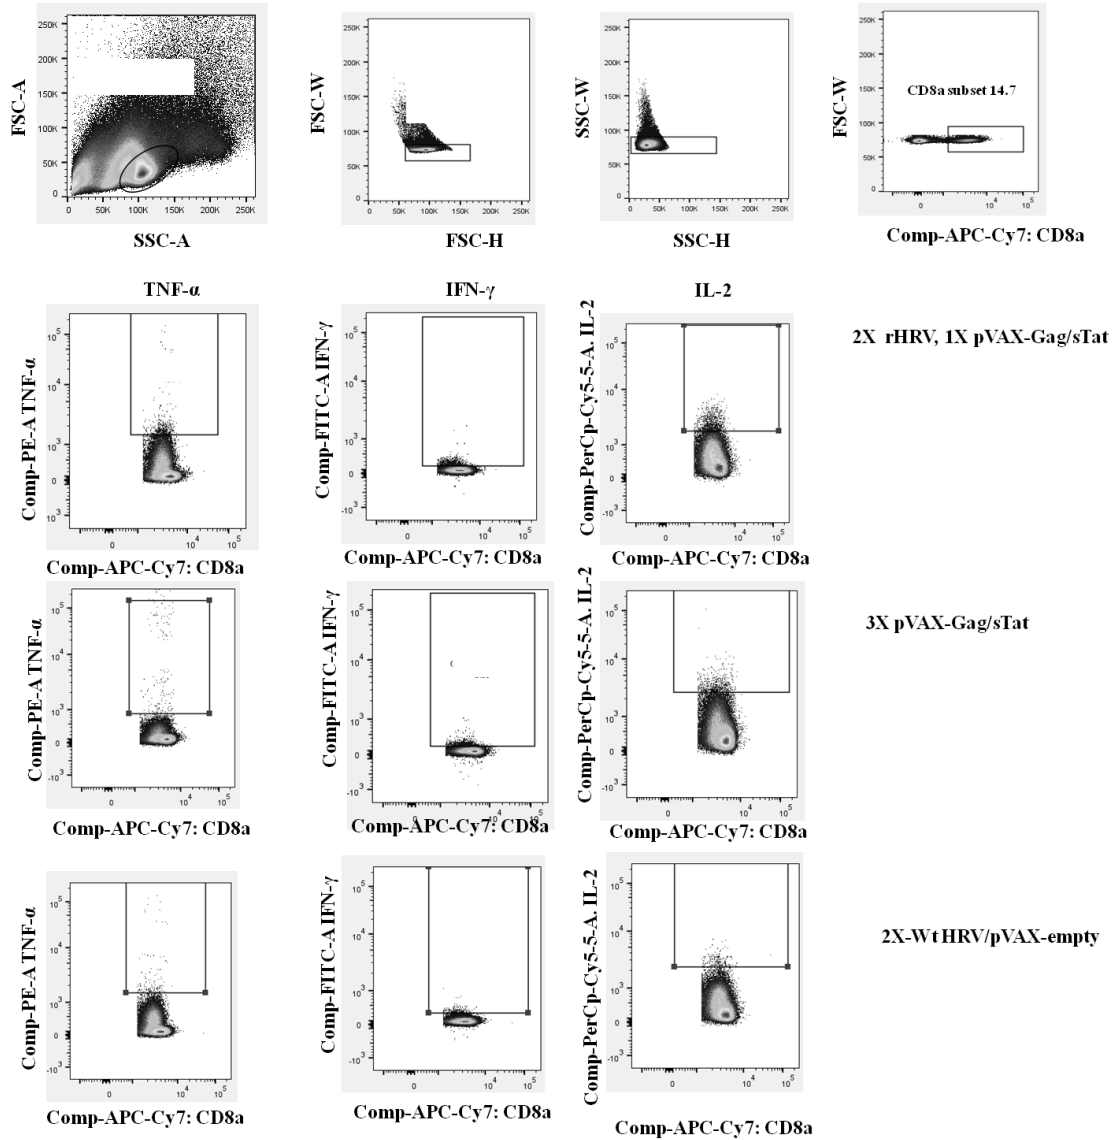

45

46 **Supplementary Fig S4. Gating strategy used to detect polyfunctional CD8<sup>+</sup>T cells in the**

47 **gut.** Mice were vaccinated as described in the legend to figure 1 and lymphocytes from

48 mesenteric lymph nodes harvested 14 days after the final dose. Mesenteric lymphocytes were

49 gated on the lymphocyte population, followed by doublet discrimination, and then gated on

50 CD8<sup>+</sup> T cells to assess the frequency of IFN- $\gamma$ , TNF- $\alpha$  and IL-2. Representative plots for IFN-

51  $\gamma$ , TNF- $\alpha$  and IL-2 positive cells are shown.

52

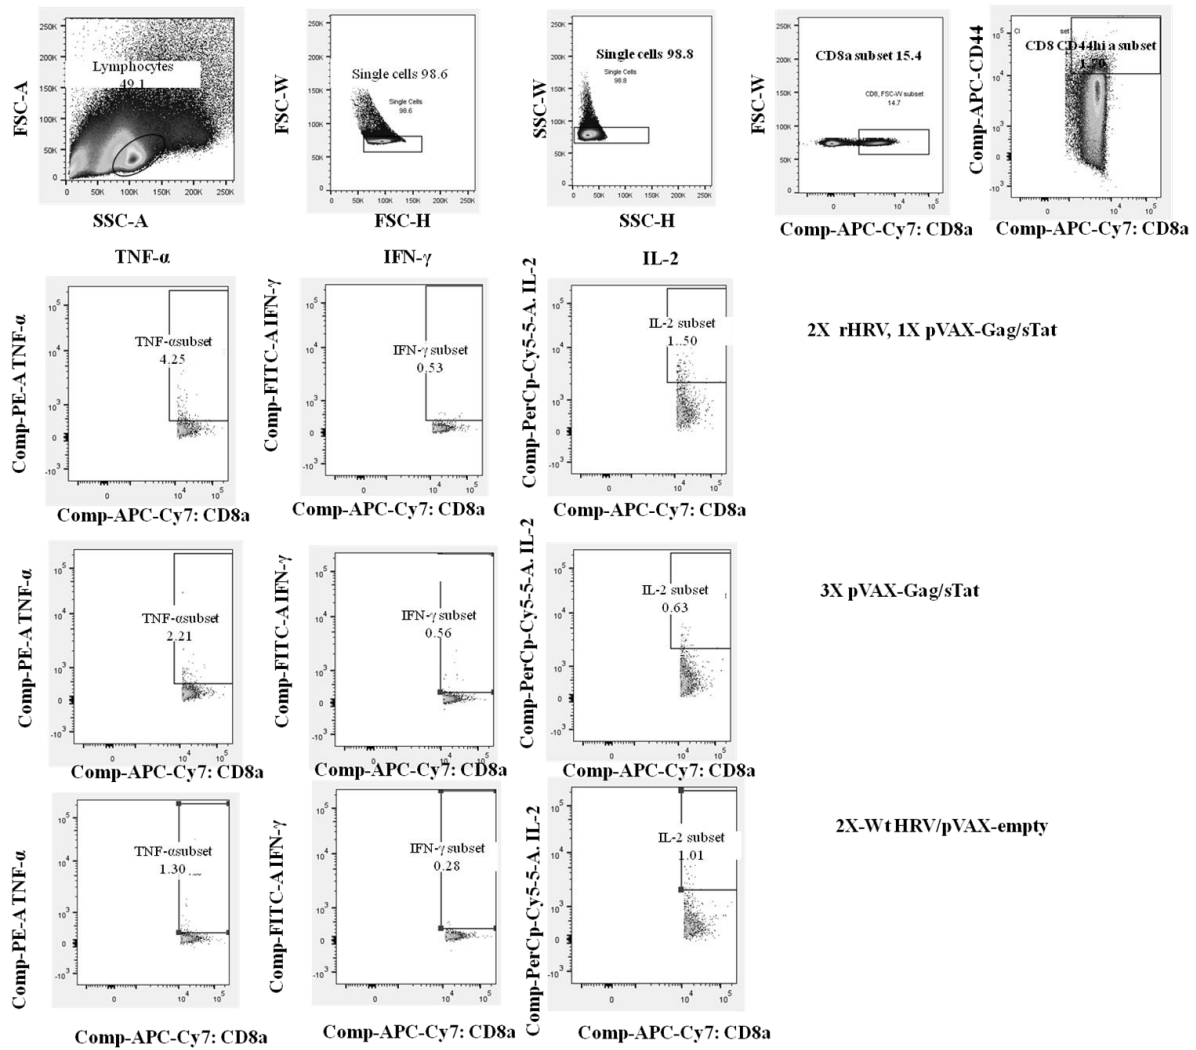

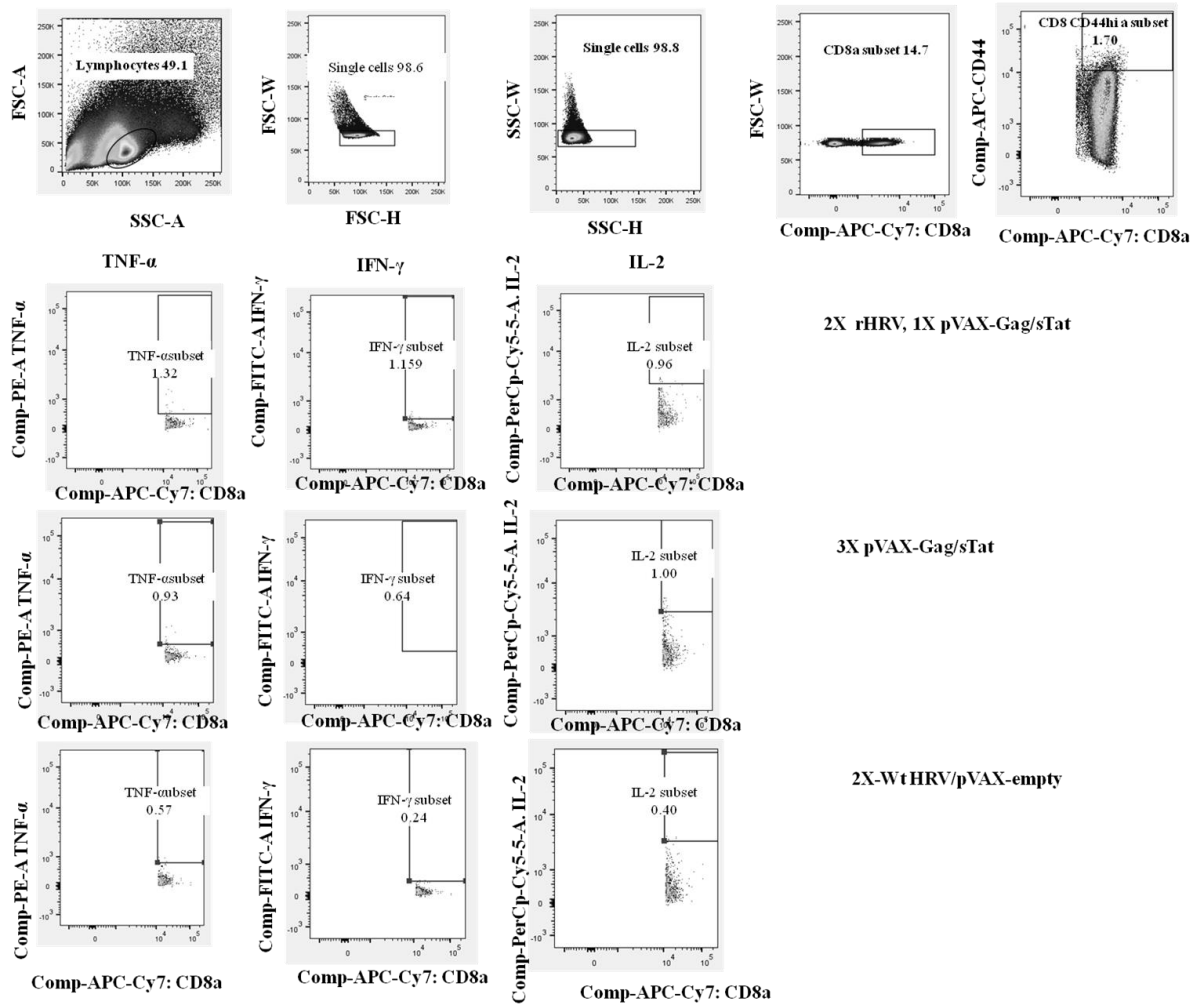

60

61 **Supplementary Fig S6. Gating strategy used to detect polyfunctional effector memory**

62 **CD8<sup>+</sup>T cells in the spleen.** Mice were vaccinated as described in the legend to figure 1 and

63 lymphocytes from mesenteric lymph nodes harvested 14 days after the final dose. Mesenteric

64 lymphocytes were gated on the lymphocyte population, followed by doublet discrimination,

65 and then gated on CD44<sup>hi</sup>CD8<sup>+</sup>T cells to assess the frequency of IFN- $\gamma$ , TNF- $\alpha$  and IL-2.

66 Representative plots for IFN- $\gamma$ , TNF- $\alpha$  and IL-2 positive cells are shown.

67

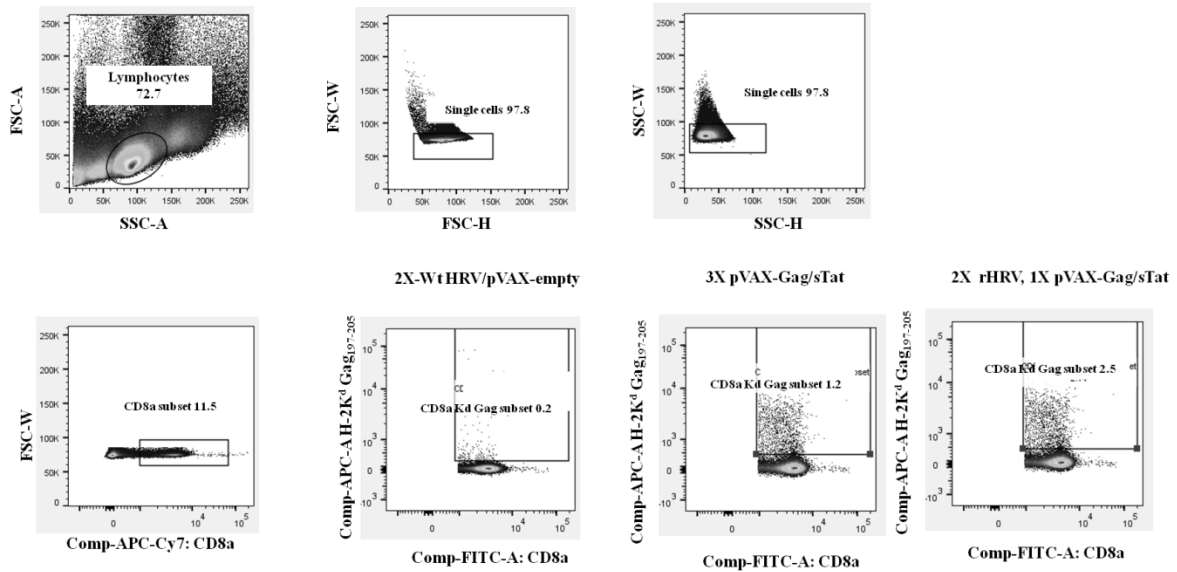

69 **Supplementary Fig S7. Gating strategy to detect CD8<sup>+</sup> T cells in the spleen staining**  
 70 **positive with the H-2K<sup>d</sup>-restricted Gag<sub>197-205</sub> peptide.** Mice were vaccinated as described in  
 71 the legend to figure 1 and lymphocytes from mesenteric lymph nodes harvested 14 days after  
 72 the final dose. Splenocytes were gated on the lymphocyte population, followed by doublet  
 73 discrimination, and then on H-2K<sup>d</sup>-restricted Gag<sub>197-205</sub> CD8<sup>+</sup>T<sup>+</sup>
